# Supplementary material for: Analysis of histology and long noncoding RNAs involved in the rabbit hair follicle density using RNA sequencing
Source: Research Square preprint supplement (doi:10.21203/rs.3.rs-43570/v2), 2021-01-13
Supplement: Supplementary file 1 [file fee7ad2ac5ef5e27e8e91931.xlsx]

## Sheet: Sheet1
Supplementary table 3. List of 22136 annotated lncRNA
Number	lncRNA name
1	LNC_000001
2	LNC_000002
3	LNC_000003
4	LNC_000004
5	LNC_000005
6	LNC_000006
7	LNC_000007
8	LNC_000008
9	LNC_000009
10	LNC_000010
11	LNC_000012
12	LNC_000011
13	LNC_000013
14	LNC_000014
15	LNC_000015
16	LNC_000016
17	LNC_000017
18	LNC_000018
19	LNC_000019
20	LNC_000020
21	LNC_000021
22	LNC_000022
23	LNC_000023
24	LNC_000024
25	LNC_000025
26	LNC_000026
27	LNC_000027
28	LNC_000028
29	LNC_000029
30	LNC_000030
31	LNC_000031
32	LNC_000032
33	LNC_000034
34	LNC_000033
35	LNC_000035
36	LNC_000036
37	LNC_000037
38	LNC_000038
39	LNC_000040
40	LNC_000039
41	LNC_000041
42	LNC_000042
43	LNC_000043
44	LNC_000044
45	LNC_000045
46	LNC_000046
47	LNC_000047
48	LNC_000048
49	LNC_000049
50	LNC_000050
51	LNC_000051
52	LNC_000052
53	LNC_000053
54	LNC_000054
55	LNC_000055
56	LNC_000056
57	LNC_000057
58	LNC_000059
59	LNC_000058
60	LNC_000060
61	LNC_000061
62	LNC_000062
63	LNC_000063
64	LNC_000064
65	LNC_000065
66	LNC_000073
67	LNC_000074
68	LNC_000066
69	LNC_000067
70	LNC_000068
71	LNC_000069
72	LNC_000070
73	LNC_000071
74	LNC_000072
75	LNC_000076
76	LNC_000075
77	LNC_000077
78	LNC_000078
79	LNC_000079
80	LNC_000081
81	LNC_000080
82	LNC_000085
83	LNC_000082
84	LNC_000084
85	LNC_000083
86	LNC_000086
87	LNC_000087
88	LNC_000088
89	LNC_000090
90	LNC_000089
91	LNC_000091
92	LNC_000092
93	LNC_000093
94	LNC_000094
95	LNC_000095
96	LNC_000096
97	LNC_000097
98	LNC_000098
99	LNC_000099
100	LNC_000100
101	LNC_000101
102	LNC_000102
103	LNC_000103
104	LNC_000104
105	LNC_000105
106	LNC_000106
107	LNC_000107
108	LNC_000108
109	LNC_000109
110	LNC_000110
111	LNC_000111
112	LNC_000112
113	LNC_000113
114	LNC_000114
115	LNC_000115
116	LNC_000116
117	LNC_000117
118	LNC_000118
119	LNC_000119
120	LNC_000120
121	LNC_000121
122	LNC_000122
123	LNC_000123
124	LNC_000124
125	LNC_000125
126	LNC_000126
127	LNC_000127
128	LNC_000128
129	LNC_000129
130	LNC_000130
131	LNC_000131
132	LNC_000132
133	LNC_000133
134	LNC_000134
135	LNC_000135
136	LNC_000136
137	LNC_000137
138	LNC_000138
139	LNC_000139
140	LNC_000140
141	LNC_000141
142	LNC_000142
143	LNC_000143
144	LNC_000144
145	LNC_000145
146	LNC_000146
147	LNC_000147
148	LNC_000148
149	LNC_000149
150	LNC_000150
151	LNC_000151
152	LNC_000152
153	LNC_000153
154	LNC_000154
155	LNC_000155
156	LNC_000156
157	LNC_000157
158	LNC_000158
159	LNC_000159
160	LNC_000160
161	LNC_000161
162	LNC_000162
163	LNC_000163
164	LNC_000164
165	LNC_000165
166	LNC_000166
167	LNC_000167
168	LNC_000168
169	LNC_000169
170	LNC_000170
171	LNC_000171
172	LNC_000172
173	LNC_000173
174	LNC_000174
175	LNC_000175
176	LNC_000176
177	LNC_000177
178	LNC_000178
179	LNC_000179
180	LNC_000180
181	LNC_000181
182	LNC_000182
183	LNC_000183
184	LNC_000184
185	LNC_000185
186	LNC_000186
187	LNC_000187
188	LNC_000188
189	LNC_000189
190	LNC_000190
191	LNC_000191
192	LNC_000192
193	LNC_000193
194	LNC_000194
195	LNC_000195
196	LNC_000196
197	LNC_000198
198	LNC_000197
199	LNC_000199
200	LNC_000200
201	LNC_000201
202	LNC_000202
203	LNC_000203
204	LNC_000204
205	LNC_000205
206	LNC_000206
207	LNC_000207
208	LNC_000208
209	LNC_000209
210	LNC_000210
211	LNC_000211
212	LNC_000212
213	LNC_000213
214	LNC_000214
215	LNC_000215
216	LNC_000216
217	LNC_000217
218	LNC_000218
219	LNC_000219
220	LNC_000220
221	LNC_000221
222	LNC_000222
223	LNC_000223
224	LNC_000224
225	LNC_000225
226	LNC_000226
227	LNC_000227
228	LNC_000228
229	LNC_000229
230	LNC_000230
231	LNC_000231
232	LNC_000232
233	LNC_000233
234	LNC_000234
235	LNC_000235
236	LNC_000236
237	LNC_000237
238	LNC_000238
239	LNC_000239
240	LNC_000240
241	LNC_000241
242	LNC_000242
243	LNC_000243
244	LNC_000244
245	LNC_000245
246	LNC_000246
247	LNC_000247
248	LNC_000248
249	LNC_000249
250	LNC_000250
251	LNC_000251
252	LNC_000252
253	LNC_000253
254	LNC_000254
255	LNC_000255
256	LNC_000256
257	LNC_000257
258	LNC_000258
259	LNC_000259
260	LNC_000260
261	LNC_000261
262	LNC_000262
263	LNC_000263
264	LNC_000264
265	LNC_000265
266	LNC_000266
267	LNC_000267
268	LNC_000268
269	LNC_000269
270	LNC_000270
271	LNC_000271
272	LNC_000272
273	LNC_000273
274	LNC_000274
275	LNC_000275
276	LNC_000276
277	LNC_000277
278	LNC_000278
279	LNC_000279
280	LNC_000280
281	LNC_000281
282	LNC_000282
283	LNC_000283
284	LNC_000284
285	LNC_000285
286	LNC_000286
287	LNC_000287
288	LNC_000288
289	LNC_000289
290	LNC_000290
291	LNC_000291
292	LNC_000292
293	LNC_000293
294	LNC_000294
295	LNC_000295
296	LNC_000296
297	LNC_000297
298	LNC_000299
299	LNC_000298
300	LNC_000300
301	LNC_000301
302	LNC_000302
303	LNC_000303
304	LNC_000304
305	LNC_000305
306	LNC_000306
307	LNC_000307
308	LNC_000308
309	LNC_000309
310	LNC_000310
311	LNC_000311
312	LNC_000312
313	LNC_000313
314	LNC_000314
315	LNC_000315
316	LNC_000316
317	LNC_000317
318	LNC_000318
319	LNC_000319
320	LNC_000320
321	LNC_000321
322	LNC_000322
323	LNC_000323
324	LNC_000324
325	LNC_000325
326	LNC_000326
327	LNC_000327
328	LNC_000328
329	LNC_000329
330	LNC_000330
331	LNC_000331
332	LNC_000332
333	LNC_000333
334	LNC_000334
335	LNC_000335
336	LNC_000336
337	LNC_000337
338	LNC_000338
339	LNC_000339
340	LNC_000340
341	LNC_000341
342	LNC_000342
343	LNC_000343
344	LNC_000344
345	LNC_000345
346	LNC_000346
347	LNC_000347
348	LNC_000348
349	LNC_000349
350	LNC_000350
351	LNC_000351
352	LNC_000352
353	LNC_000353
354	LNC_000354
355	LNC_000356
356	LNC_000355
357	LNC_000357
358	LNC_000358
359	LNC_000359
360	LNC_000360
361	LNC_000361
362	LNC_000362
363	LNC_000363
364	LNC_000364
365	LNC_000365
366	LNC_000366
367	LNC_000367
368	LNC_000368
369	LNC_000369
370	LNC_000370
371	LNC_000371
372	LNC_000372
373	LNC_000373
374	LNC_000374
375	LNC_000375
376	LNC_000376
377	LNC_000377
378	LNC_000378
379	LNC_000379
380	LNC_000380
381	LNC_000381
382	LNC_000382
383	LNC_000383
384	LNC_000384
385	LNC_000385
386	LNC_000386
387	LNC_000387
388	LNC_000388
389	LNC_000389
390	LNC_000390
391	LNC_000391
392	LNC_000395
393	LNC_000394
394	LNC_000392
395	LNC_000393
396	LNC_000396
397	LNC_000397
398	LNC_000398
399	LNC_000399
400	LNC_000400
401	LNC_000401
402	LNC_000402
403	LNC_000403
404	LNC_000404
405	LNC_000405
406	LNC_000406
407	LNC_000407
408	LNC_000408
409	LNC_000409
410	LNC_000410
411	LNC_000411
412	LNC_000412
413	LNC_000413
414	LNC_000414
415	LNC_000415
416	LNC_000416
417	LNC_000417
418	LNC_000418
419	LNC_000419
420	LNC_000420
421	LNC_000421
422	LNC_000422
423	LNC_000423
424	LNC_000424
425	LNC_000425
426	LNC_000426
427	LNC_000427
428	LNC_000428
429	LNC_000429
430	LNC_000430
431	LNC_000431
432	LNC_000432
433	LNC_000433
434	LNC_000434
435	LNC_000435
436	LNC_000437
437	LNC_000436
438	LNC_000438
439	LNC_000439
440	LNC_000440
441	LNC_000441
442	LNC_000442
443	LNC_000443
444	LNC_000444
445	LNC_000445
446	LNC_000446
447	LNC_000447
448	LNC_000448
449	LNC_000449
450	LNC_000450
451	LNC_000451
452	LNC_000452
453	LNC_000453
454	LNC_000454
455	LNC_000455
456	LNC_000456
457	LNC_000457
458	LNC_000458
459	LNC_000459
460	LNC_000460
461	LNC_000461
462	LNC_000462
463	LNC_000463
464	LNC_000464
465	LNC_000465
466	LNC_000466
467	LNC_000467
468	LNC_000468
469	LNC_000469
470	LNC_000470
471	LNC_000471
472	LNC_000472
473	LNC_000473
474	LNC_000474
475	LNC_000475
476	LNC_000476
477	LNC_000477
478	LNC_000478
479	LNC_000479
480	LNC_000480
481	LNC_000481
482	LNC_000482
483	LNC_000483
484	LNC_000484
485	LNC_000485
486	LNC_000486
487	LNC_000487
488	LNC_000488
489	LNC_000489
490	LNC_000490
491	LNC_000491
492	LNC_000492
493	LNC_000493
494	LNC_000494
495	LNC_000495
496	LNC_000496
497	LNC_000497
498	LNC_000498
499	LNC_000499
500	LNC_000500
501	LNC_000501
502	LNC_000502
503	LNC_000503
504	LNC_000504
505	LNC_000505
506	LNC_000506
507	LNC_000507
508	LNC_000508
509	LNC_000509
510	LNC_000510
511	LNC_000511
512	LNC_000512
513	LNC_000513
514	LNC_000514
515	LNC_000515
516	LNC_000516
517	LNC_000517
518	LNC_000518
519	LNC_000519
520	LNC_000520
521	LNC_000521
522	LNC_000522
523	LNC_000523
524	LNC_000524
525	LNC_000525
526	LNC_000526
527	LNC_000527
528	LNC_000528
529	LNC_000529
530	LNC_000530
531	LNC_000531
532	LNC_000532
533	LNC_000533
534	LNC_000534
535	LNC_000535
536	LNC_000536
537	LNC_000537
538	LNC_000538
539	LNC_000539
540	LNC_000540
541	LNC_000541
542	LNC_000542
543	LNC_000543
544	LNC_000544
545	LNC_000545
546	LNC_000546
547	LNC_000547
548	LNC_000548
549	LNC_000549
550	LNC_000550
551	LNC_000551
552	LNC_000552
553	LNC_000553
554	LNC_000554
555	LNC_000555
556	LNC_000556
557	LNC_000557
558	LNC_000558
559	LNC_000559
560	LNC_000560
561	LNC_000561
562	LNC_000562
563	LNC_000563
564	LNC_000564
565	LNC_000565
566	LNC_000566
567	LNC_000567
568	LNC_000568
569	LNC_000569
570	LNC_000570
571	LNC_000571
572	LNC_000572
573	LNC_000573
574	LNC_000574
575	LNC_000575
576	LNC_000576
577	LNC_000577
578	LNC_000578
579	LNC_000579
580	LNC_000580
581	LNC_000581
582	LNC_000582
583	LNC_000583
584	LNC_000584
585	LNC_000585
586	LNC_000586
587	LNC_000587
588	LNC_000588
589	LNC_000589
590	LNC_000590
591	LNC_000591
592	LNC_000592
593	LNC_000593
594	LNC_000594
595	LNC_000595
596	LNC_000596
597	LNC_000597
598	LNC_000598
599	LNC_000599
600	LNC_000600
601	LNC_000601
602	LNC_000602
603	LNC_000603
604	LNC_000604
605	LNC_000605
606	LNC_000606
607	LNC_000607
608	LNC_000608
609	LNC_000609
610	LNC_000610
611	LNC_000611
612	LNC_000612
613	LNC_000613
614	LNC_000614
615	LNC_000615
616	LNC_000616
617	LNC_000617
618	LNC_000619
619	LNC_000618
620	LNC_000620
621	LNC_000621
622	LNC_000622
623	LNC_000623
624	LNC_000624
625	LNC_000625
626	LNC_000626
627	LNC_000627
628	LNC_000628
629	LNC_000629
630	LNC_000630
631	LNC_000631
632	LNC_000632
633	LNC_000633
634	LNC_000634
635	LNC_000635
636	LNC_000636
637	LNC_000637
638	LNC_000638
639	LNC_000639
640	LNC_000640
641	LNC_000641
642	LNC_000642
643	LNC_000643
644	LNC_000644
645	LNC_000645
646	LNC_000646
647	LNC_000647
648	LNC_000648
649	LNC_000649
650	LNC_000650
651	LNC_000651
652	LNC_000652
653	LNC_000654
654	LNC_000653
655	LNC_000655
656	LNC_000656
657	LNC_000657
658	LNC_000658
659	LNC_000659
660	LNC_000660
661	LNC_000661
662	LNC_000662
663	LNC_000663
664	LNC_000664
665	LNC_000666
666	LNC_000665
667	LNC_000667
668	LNC_000668
669	LNC_000669
670	LNC_000670
671	LNC_000671
672	LNC_000672
673	LNC_000673
674	LNC_000674
675	LNC_000675
676	LNC_000676
677	LNC_000677
678	LNC_000678
679	LNC_000679
680	LNC_000680
681	LNC_000681
682	LNC_000682
683	LNC_000683
684	LNC_000684
685	LNC_000685
686	LNC_000686
687	LNC_000687
688	LNC_000688
689	LNC_000690
690	LNC_000689
691	LNC_000692
692	LNC_000691
693	LNC_000693
694	LNC_000694
695	LNC_000695
696	LNC_000696
697	LNC_000697
698	LNC_000698
699	LNC_000699
700	LNC_000700
701	LNC_000701
702	LNC_000702
703	LNC_000703
704	LNC_000705
705	LNC_000706
706	LNC_000704
707	LNC_000707
708	LNC_000708
709	LNC_000709
710	LNC_000711
711	LNC_000710
712	LNC_000712
713	LNC_000713
714	LNC_000714
715	LNC_000715
716	LNC_000716
717	LNC_000717
718	LNC_000718
719	LNC_000719
720	LNC_000720
721	LNC_000721
722	LNC_000722
723	LNC_000723
724	LNC_000724
725	LNC_000725
726	LNC_000726
727	LNC_000727
728	LNC_000730
729	LNC_000729
730	LNC_000728
731	LNC_000731
732	LNC_000732
733	LNC_000733
734	LNC_000734
735	LNC_000735
736	LNC_000736
737	LNC_000737
738	LNC_000738
739	LNC_000739
740	LNC_000740
741	LNC_000741
742	LNC_000742
743	LNC_000743
744	LNC_000744
745	LNC_000745
746	LNC_000746
747	LNC_000747
748	LNC_000748
749	LNC_000749
750	LNC_000750
751	LNC_000751
752	LNC_000752
753	LNC_000753
754	LNC_000754
755	LNC_000755
756	LNC_000756
757	LNC_000757
758	LNC_000758
759	LNC_000759
760	LNC_000760
761	LNC_000761
762	LNC_000762
763	LNC_000763
764	LNC_000764
765	LNC_000765
766	LNC_000766
767	LNC_000769
768	LNC_000768
769	LNC_000767
770	LNC_000773
771	LNC_000774
772	LNC_000770
773	LNC_000775
774	LNC_000776
775	LNC_000777
776	LNC_000771
777	LNC_000772
778	LNC_000778
779	LNC_000779
780	LNC_000780
781	LNC_000781
782	LNC_000782
783	LNC_000783
784	LNC_000784
785	LNC_000785
786	LNC_000786
787	LNC_000787
788	LNC_000789
789	LNC_000788
790	LNC_000790
791	LNC_000791
792	LNC_000792
793	LNC_000793
794	LNC_000798
795	LNC_000794
796	LNC_000795
797	LNC_000796
798	LNC_000797
799	LNC_000799
800	LNC_000801
801	LNC_000800
802	LNC_000802
803	LNC_000803
804	LNC_000804
805	LNC_000805
806	LNC_000806
807	LNC_000807
808	LNC_000808
809	LNC_000809
810	LNC_000810
811	LNC_000811
812	LNC_000812
813	LNC_000813
814	LNC_000814
815	LNC_000816
816	LNC_000815
817	LNC_000817
818	LNC_000818
819	LNC_000819
820	LNC_000820
821	LNC_000821
822	LNC_000822
823	LNC_000823
824	LNC_000824
825	LNC_000825
826	LNC_000826
827	LNC_000827
828	LNC_000828
829	LNC_000829
830	LNC_000830
831	LNC_000831
832	LNC_000832
833	LNC_000833
834	LNC_000834
835	LNC_000835
836	LNC_000836
837	LNC_000837
838	LNC_000838
839	LNC_000839
840	LNC_000840
841	LNC_000841
842	LNC_000842
843	LNC_000843
844	LNC_000844
845	LNC_000845
846	LNC_000846
847	LNC_000847
848	LNC_000848
849	LNC_000849
850	LNC_000850
851	LNC_000851
852	LNC_000852
853	LNC_000853
854	LNC_000854
855	LNC_000855
856	LNC_000856
857	LNC_000857
858	LNC_000858
859	LNC_000859
860	LNC_000860
861	LNC_000861
862	LNC_000862
863	LNC_000863
864	LNC_000864
865	LNC_000865
866	LNC_000866
867	LNC_000867
868	LNC_000868
869	LNC_000869
870	LNC_000870
871	LNC_000871
872	LNC_000874
873	LNC_000873
874	LNC_000872
875	LNC_000876
876	LNC_000875
877	LNC_000877
878	LNC_000878
879	LNC_000879
880	LNC_000880
881	LNC_000881
882	LNC_000882
883	LNC_000883
884	LNC_000884
885	LNC_000885
886	LNC_000886
887	LNC_000887
888	LNC_000888
889	LNC_000889
890	LNC_000890
891	LNC_000891
892	LNC_000892
893	LNC_000893
894	LNC_000894
895	LNC_000895
896	LNC_000896
897	LNC_000897
898	LNC_000898
899	LNC_000899
900	LNC_000900
901	LNC_000901
902	LNC_000902
903	LNC_000903
904	LNC_000904
905	LNC_000905
906	LNC_000906
907	LNC_000907
908	LNC_000908
909	LNC_000909
910	LNC_000910
911	LNC_000911
912	LNC_000915
913	LNC_000916
914	LNC_000917
915	LNC_000918
916	LNC_000919
917	LNC_000912
918	LNC_000913
919	LNC_000914
920	LNC_000920
921	LNC_000921
922	LNC_000922
923	LNC_000923
924	LNC_000924
925	LNC_000925
926	LNC_000926
927	LNC_000927
928	LNC_000928
929	LNC_000929
930	LNC_000930
931	LNC_000931
932	LNC_000932
933	LNC_000933
934	LNC_000934
935	LNC_000935
936	LNC_000936
937	LNC_000937
938	LNC_000938
939	LNC_000939
940	LNC_000940
941	LNC_000941
942	LNC_000942
943	LNC_000943
944	LNC_000944
945	LNC_000945
946	LNC_000946
947	LNC_000947
948	LNC_000948
949	LNC_000949
950	LNC_000950
951	LNC_000951
952	LNC_000952
953	LNC_000953
954	LNC_000954
955	LNC_000955
956	LNC_000956
957	LNC_000957
958	LNC_000958
959	LNC_000959
960	LNC_000960
961	LNC_000961
962	LNC_000962
963	LNC_000963
964	LNC_000964
965	LNC_000965
966	LNC_000966
967	LNC_000967
968	LNC_000968
969	LNC_000969
970	LNC_000970
971	LNC_000971
972	LNC_000972
973	LNC_000973
974	LNC_000974
975	LNC_000975
976	LNC_000976
977	LNC_000977
978	LNC_000978
979	LNC_000979
980	LNC_000980
981	LNC_000981
982	LNC_000982
983	LNC_000983
984	LNC_000984
985	LNC_000985
986	LNC_000986
987	LNC_000987
988	LNC_000988
989	LNC_000989
990	LNC_000990
991	LNC_000991
992	LNC_000992
993	LNC_000993
994	LNC_000994
995	LNC_000995
996	LNC_000996
997	LNC_000997
998	LNC_000998
999	LNC_000999
1000	LNC_001000
1001	LNC_001001
1002	LNC_001002
1003	LNC_001003
1004	LNC_001004
1005	LNC_001005
1006	LNC_001006
1007	LNC_001007
1008	LNC_001008
1009	LNC_001010
1010	LNC_001009
1011	LNC_001011
1012	LNC_001012
1013	LNC_001013
1014	LNC_001014
1015	LNC_001015
1016	LNC_001016
1017	LNC_001017
1018	LNC_001018
1019	LNC_001019
1020	LNC_001020
1021	LNC_001021
1022	LNC_001023
1023	LNC_001022
1024	LNC_001024
1025	LNC_001025
1026	LNC_001026
1027	LNC_001027
1028	LNC_001028
1029	LNC_001029
1030	LNC_001030
1031	LNC_001031
1032	LNC_001032
1033	LNC_001033
1034	LNC_001034
1035	LNC_001035
1036	LNC_001036
1037	LNC_001037
1038	LNC_001038
1039	LNC_001039
1040	LNC_001040
1041	LNC_001041
1042	LNC_001042
1043	LNC_001043
1044	LNC_001044
1045	LNC_001045
1046	LNC_001046
1047	LNC_001047
1048	LNC_001048
1049	LNC_001049
1050	LNC_001050
1051	LNC_001051
1052	LNC_001052
1053	LNC_001053
1054	LNC_001054
1055	LNC_001055
1056	LNC_001056
1057	LNC_001057
1058	LNC_001058
1059	LNC_001060
1060	LNC_001059
1061	LNC_001061
1062	LNC_001062
1063	LNC_001063
1064	LNC_001064
1065	LNC_001065
1066	LNC_001066
1067	LNC_001067
1068	LNC_001068
1069	LNC_001069
1070	LNC_001070
1071	LNC_001071
1072	LNC_001072
1073	LNC_001073
1074	LNC_001074
1075	LNC_001075
1076	LNC_001076
1077	LNC_001077
1078	LNC_001078
1079	LNC_001079
1080	LNC_001080
1081	LNC_001081
1082	LNC_001083
1083	LNC_001082
1084	LNC_001084
1085	LNC_001085
1086	LNC_001086
1087	LNC_001087
1088	LNC_001088
1089	LNC_001089
1090	LNC_001090
1091	LNC_001091
1092	LNC_001092
1093	LNC_001093
1094	LNC_001095
1095	LNC_001094
1096	LNC_001096
1097	LNC_001097
1098	LNC_001098
1099	LNC_001099
1100	LNC_001100
1101	LNC_001101
1102	LNC_001102
1103	LNC_001104
1104	LNC_001103
1105	LNC_001105
1106	LNC_001106
1107	LNC_001107
1108	LNC_001108
1109	LNC_001109
1110	LNC_001110
1111	LNC_001111
1112	LNC_001112
1113	LNC_001113
1114	LNC_001115
1115	LNC_001114
1116	LNC_001116
1117	LNC_001117
1118	LNC_001118
1119	LNC_001119
1120	LNC_001120
1121	LNC_001121
1122	LNC_001122
1123	LNC_001123
1124	LNC_001124
1125	LNC_001125
1126	LNC_001126
1127	LNC_001127
1128	LNC_001128
1129	LNC_001129
1130	LNC_001130
1131	LNC_001131
1132	LNC_001132
1133	LNC_001134
1134	LNC_001133
1135	LNC_001135
1136	LNC_001136
1137	LNC_001137
1138	LNC_001138
1139	LNC_001139
1140	LNC_001140
1141	LNC_001141
1142	LNC_001142
1143	LNC_001143
1144	LNC_001144
1145	LNC_001145
1146	LNC_001146
1147	LNC_001147
1148	LNC_001148
1149	LNC_001149
1150	LNC_001150
1151	LNC_001151
1152	LNC_001152
1153	LNC_001153
1154	LNC_001154
1155	LNC_001156
1156	LNC_001155
1157	LNC_001157
1158	LNC_001158
1159	LNC_001159
1160	LNC_001160
1161	LNC_001161
1162	LNC_001162
1163	LNC_001163
1164	LNC_001164
1165	LNC_001165
1166	LNC_001166
1167	LNC_001167
1168	LNC_001169
1169	LNC_001168
1170	LNC_001170
1171	LNC_001171
1172	LNC_001172
1173	LNC_001173
1174	LNC_001174
1175	LNC_001175
1176	LNC_001176
1177	LNC_001177
1178	LNC_001178
1179	LNC_001180
1180	LNC_001179
1181	LNC_001181
1182	LNC_001182
1183	LNC_001183
1184	LNC_001184
1185	LNC_001185
1186	LNC_001186
1187	LNC_001187
1188	LNC_001188
1189	LNC_001189
1190	LNC_001190
1191	LNC_001191
1192	LNC_001192
1193	LNC_001193
1194	LNC_001194
1195	LNC_001196
1196	LNC_001195
1197	LNC_001197
1198	LNC_001198
1199	LNC_001199
1200	LNC_001200
1201	LNC_001201
1202	LNC_001202
1203	LNC_001203
1204	LNC_001204
1205	LNC_001205
1206	LNC_001206
1207	LNC_001207
1208	LNC_001208
1209	LNC_001209
1210	LNC_001210
1211	LNC_001211
1212	LNC_001212
1213	LNC_001213
1214	LNC_001214
1215	LNC_001215
1216	LNC_001216
1217	LNC_001217
1218	LNC_001218
1219	LNC_001219
1220	LNC_001221
1221	LNC_001223
1222	LNC_001222
1223	LNC_001224
1224	LNC_001225
1225	LNC_001220
1226	LNC_001226
1227	LNC_001227
1228	LNC_001228
1229	LNC_001229
1230	LNC_001230
1231	LNC_001231
1232	LNC_001232
1233	LNC_001233
1234	LNC_001234
1235	LNC_001235
1236	LNC_001236
1237	LNC_001237
1238	LNC_001238
1239	LNC_001239
1240	LNC_001240
1241	LNC_001241
1242	LNC_001242
1243	LNC_001243
1244	LNC_001244
1245	LNC_001245
1246	LNC_001246
1247	LNC_001247
1248	LNC_001248
1249	LNC_001249
1250	LNC_001250
1251	LNC_001251
1252	LNC_001252
1253	LNC_001253
1254	LNC_001254
1255	LNC_001255
1256	LNC_001256
1257	LNC_001257
1258	LNC_001258
1259	LNC_001260
1260	LNC_001259
1261	LNC_001261
1262	LNC_001262
1263	LNC_001263
1264	LNC_001264
1265	LNC_001265
1266	LNC_001266
1267	LNC_001267
1268	LNC_001268
1269	LNC_001269
1270	LNC_001270
1271	LNC_001271
1272	LNC_001272
1273	LNC_001273
1274	LNC_001274
1275	LNC_001275
1276	LNC_001276
1277	LNC_001277
1278	LNC_001278
1279	LNC_001279
1280	LNC_001280
1281	LNC_001281
1282	LNC_001282
1283	LNC_001283
1284	LNC_001284
1285	LNC_001285
1286	LNC_001286
1287	LNC_001287
1288	LNC_001288
1289	LNC_001289
1290	LNC_001293
1291	LNC_001292
1292	LNC_001291
1293	LNC_001290
1294	LNC_001294
1295	LNC_001295
1296	LNC_001296
1297	LNC_001297
1298	LNC_001298
1299	LNC_001299
1300	LNC_001300
1301	LNC_001301
1302	LNC_001302
1303	LNC_001303
1304	LNC_001304
1305	LNC_001305
1306	LNC_001306
1307	LNC_001307
1308	LNC_001308
1309	LNC_001309
1310	LNC_001310
1311	LNC_001311
1312	LNC_001312
1313	LNC_001313
1314	LNC_001314
1315	LNC_001315
1316	LNC_001316
1317	LNC_001317
1318	LNC_001318
1319	LNC_001319
1320	LNC_001320
1321	LNC_001321
1322	LNC_001322
1323	LNC_001323
1324	LNC_001324
1325	LNC_001325
1326	LNC_001326
1327	LNC_001327
1328	LNC_001328
1329	LNC_001329
1330	LNC_001331
1331	LNC_001330
1332	LNC_001332
1333	LNC_001333
1334	LNC_001334
1335	LNC_001335
1336	LNC_001336
1337	LNC_001337
1338	LNC_001338
1339	LNC_001339
1340	LNC_001340
1341	LNC_001341
1342	LNC_001342
1343	LNC_001343
1344	LNC_001344
1345	LNC_001345
1346	LNC_001347
1347	LNC_001346
1348	LNC_001348
1349	LNC_001349
1350	LNC_001350
1351	LNC_001352
1352	LNC_001351
1353	LNC_001353
1354	LNC_001354
1355	LNC_001355
1356	LNC_001356
1357	LNC_001357
1358	LNC_001358
1359	LNC_001359
1360	LNC_001360
1361	LNC_001362
1362	LNC_001361
1363	LNC_001363
1364	LNC_001364
1365	LNC_001365
1366	LNC_001366
1367	LNC_001367
1368	LNC_001368
1369	LNC_001369
1370	LNC_001370
1371	LNC_001371
1372	LNC_001372
1373	LNC_001373
1374	LNC_001374
1375	LNC_001375
1376	LNC_001376
1377	LNC_001377
1378	LNC_001378
1379	LNC_001379
1380	LNC_001380
1381	LNC_001381
1382	LNC_001382
1383	LNC_001383
1384	LNC_001384
1385	LNC_001386
1386	LNC_001385
1387	LNC_001387
1388	LNC_001388
1389	LNC_001389
1390	LNC_001390
1391	LNC_001391
1392	LNC_001392
1393	LNC_001393
1394	LNC_001394
1395	LNC_001395
1396	LNC_001396
1397	LNC_001397
1398	LNC_001398
1399	LNC_001399
1400	LNC_001401
1401	LNC_001400
1402	LNC_001403
1403	LNC_001402
1404	LNC_001405
1405	LNC_001404
1406	LNC_001406
1407	LNC_001407
1408	LNC_001408
1409	LNC_001409
1410	LNC_001410
1411	LNC_001411
1412	LNC_001412
1413	LNC_001414
1414	LNC_001413
1415	LNC_001415
1416	LNC_001416
1417	LNC_001417
1418	LNC_001418
1419	LNC_001419
1420	LNC_001420
1421	LNC_001421
1422	LNC_001422
1423	LNC_001423
1424	LNC_001424
1425	LNC_001425
1426	LNC_001426
1427	LNC_001427
1428	LNC_001428
1429	LNC_001429
1430	LNC_001430
1431	LNC_001431
1432	LNC_001432
1433	LNC_001433
1434	LNC_001434
1435	LNC_001436
1436	LNC_001437
1437	LNC_001435
1438	LNC_001438
1439	LNC_001439
1440	LNC_001440
1441	LNC_001441
1442	LNC_001442
1443	LNC_001443
1444	LNC_001444
1445	LNC_001445
1446	LNC_001446
1447	LNC_001447
1448	LNC_001448
1449	LNC_001449
1450	LNC_001450
1451	LNC_001452
1452	LNC_001451
1453	LNC_001453
1454	LNC_001454
1455	LNC_001455
1456	LNC_001456
1457	LNC_001457
1458	LNC_001458
1459	LNC_001459
1460	LNC_001460
1461	LNC_001461
1462	LNC_001462
1463	LNC_001463
1464	LNC_001464
1465	LNC_001465
1466	LNC_001467
1467	LNC_001466
1468	LNC_001468
1469	LNC_001469
1470	LNC_001470
1471	LNC_001471
1472	LNC_001472
1473	LNC_001473
1474	LNC_001474
1475	LNC_001475
1476	LNC_001476
1477	LNC_001477
1478	LNC_001478
1479	LNC_001479
1480	LNC_001480
1481	LNC_001481
1482	LNC_001482
1483	LNC_001483
1484	LNC_001484
1485	LNC_001485
1486	LNC_001486
1487	LNC_001487
1488	LNC_001488
1489	LNC_001489
1490	LNC_001490
1491	LNC_001491
1492	LNC_001492
1493	LNC_001493
1494	LNC_001494
1495	LNC_001495
1496	LNC_001496
1497	LNC_001497
1498	LNC_001498
1499	LNC_001499
1500	LNC_001501
1501	LNC_001500
1502	LNC_001502
1503	LNC_001503
1504	LNC_001504
1505	LNC_001505
1506	LNC_001506
1507	LNC_001507
1508	LNC_001508
1509	LNC_001509
1510	LNC_001510
1511	LNC_001511
1512	LNC_001512
1513	LNC_001513
1514	LNC_001514
1515	LNC_001515
1516	LNC_001516
1517	LNC_001517
1518	LNC_001518
1519	LNC_001519
1520	LNC_001520
1521	LNC_001521
1522	LNC_001522
1523	LNC_001523
1524	LNC_001524
1525	LNC_001525
1526	LNC_001526
1527	LNC_001527
1528	LNC_001528
1529	LNC_001529
1530	LNC_001530
1531	LNC_001531
1532	LNC_001532
1533	LNC_001533
1534	LNC_001534
1535	LNC_001535
1536	LNC_001537
1537	LNC_001536
1538	LNC_001538
1539	LNC_001539
1540	LNC_001540
1541	LNC_001541
1542	LNC_001542
1543	LNC_001544
1544	LNC_001543
1545	LNC_001545
1546	LNC_001546
1547	LNC_001547
1548	LNC_001548
1549	LNC_001549
1550	LNC_001550
1551	LNC_001551
1552	LNC_001552
1553	LNC_001553
1554	LNC_001554
1555	LNC_001555
1556	LNC_001556
1557	LNC_001557
1558	LNC_001558
1559	LNC_001559
1560	LNC_001560
1561	LNC_001561
1562	LNC_001563
1563	LNC_001562
1564	LNC_001564
1565	LNC_001565
1566	LNC_001566
1567	LNC_001567
1568	LNC_001568
1569	LNC_001569
1570	LNC_001570
1571	LNC_001571
1572	LNC_001573
1573	LNC_001572
1574	LNC_001574
1575	LNC_001575
1576	LNC_001576
1577	LNC_001577
1578	LNC_001578
1579	LNC_001579
1580	LNC_001580
1581	LNC_001581
1582	LNC_001582
1583	LNC_001583
1584	LNC_001584
1585	LNC_001585
1586	LNC_001586
1587	LNC_001587
1588	LNC_001588
1589	LNC_001589
1590	LNC_001590
1591	LNC_001591
1592	LNC_001592
1593	LNC_001594
1594	LNC_001593
1595	LNC_001595
1596	LNC_001596
1597	LNC_001597
1598	LNC_001598
1599	LNC_001599
1600	LNC_001600
1601	LNC_001601
1602	LNC_001602
1603	LNC_001603
1604	LNC_001604
1605	LNC_001605
1606	LNC_001606
1607	LNC_001607
1608	LNC_001609
1609	LNC_001608
1610	LNC_001610
1611	LNC_001611
1612	LNC_001612
1613	LNC_001613
1614	LNC_001614
1615	LNC_001615
1616	LNC_001617
1617	LNC_001616
1618	LNC_001619
1619	LNC_001618
1620	LNC_001620
1621	LNC_001621
1622	LNC_001623
1623	LNC_001622
1624	LNC_001624
1625	LNC_001625
1626	LNC_001626
1627	LNC_001627
1628	LNC_001628
1629	LNC_001629
1630	LNC_001630
1631	LNC_001631
1632	LNC_001632
1633	LNC_001633
1634	LNC_001634
1635	LNC_001636
1636	LNC_001635
1637	LNC_001637
1638	LNC_001638
1639	LNC_001639
1640	LNC_001640
1641	LNC_001641
1642	LNC_001642
1643	LNC_001643
1644	LNC_001644
1645	LNC_001645
1646	LNC_001646
1647	LNC_001647
1648	LNC_001648
1649	LNC_001649
1650	LNC_001650
1651	LNC_001651
1652	LNC_001652
1653	LNC_001653
1654	LNC_001654
1655	LNC_001655
1656	LNC_001656
1657	LNC_001657
1658	LNC_001658
1659	LNC_001659
1660	LNC_001660
1661	LNC_001661
1662	LNC_001662
1663	LNC_001663
1664	LNC_001664
1665	LNC_001665
1666	LNC_001667
1667	LNC_001666
1668	LNC_001668
1669	LNC_001669
1670	LNC_001670
1671	LNC_001671
1672	LNC_001672
1673	LNC_001673
1674	LNC_001674
1675	LNC_001675
1676	LNC_001676
1677	LNC_001677
1678	LNC_001678
1679	LNC_001679
1680	LNC_001680
1681	LNC_001681
1682	LNC_001682
1683	LNC_001683
1684	LNC_001684
1685	LNC_001685
1686	LNC_001686
1687	LNC_001687
1688	LNC_001688
1689	LNC_001689
1690	LNC_001690
1691	LNC_001691
1692	LNC_001692
1693	LNC_001696
1694	LNC_001695
1695	LNC_001694
1696	LNC_001693
1697	LNC_001697
1698	LNC_001698
1699	LNC_001699
1700	LNC_001700
1701	LNC_001701
1702	LNC_001702
1703	LNC_001703
1704	LNC_001704
1705	LNC_001705
1706	LNC_001706
1707	LNC_001707
1708	LNC_001708
1709	LNC_001709
1710	LNC_001710
1711	LNC_001711
1712	LNC_001712
1713	LNC_001713
1714	LNC_001714
1715	LNC_001715
1716	LNC_001716
1717	LNC_001717
1718	LNC_001718
1719	LNC_001719
1720	LNC_001720
1721	LNC_001721
1722	LNC_001722
1723	LNC_001723
1724	LNC_001724
1725	LNC_001725
1726	LNC_001726
1727	LNC_001727
1728	LNC_001728
1729	LNC_001729
1730	LNC_001730
1731	LNC_001731
1732	LNC_001732
1733	LNC_001733
1734	LNC_001734
1735	LNC_001735
1736	LNC_001736
1737	LNC_001737
1738	LNC_001738
1739	LNC_001739
1740	LNC_001740
1741	LNC_001741
1742	LNC_001742
1743	LNC_001743
1744	LNC_001744
1745	LNC_001745
1746	LNC_001746
1747	LNC_001747
1748	LNC_001748
1749	LNC_001749
1750	LNC_001750
1751	LNC_001751
1752	LNC_001752
1753	LNC_001753
1754	LNC_001754
1755	LNC_001755
1756	LNC_001756
1757	LNC_001757
1758	LNC_001758
1759	LNC_001759
1760	LNC_001760
1761	LNC_001761
1762	LNC_001762
1763	LNC_001763
1764	LNC_001764
1765	LNC_001765
1766	LNC_001766
1767	LNC_001767
1768	LNC_001768
1769	LNC_001769
1770	LNC_001770
1771	LNC_001771
1772	LNC_001773
1773	LNC_001772
1774	LNC_001775
1775	LNC_001774
1776	LNC_001776
1777	LNC_001777
1778	LNC_001780
1779	LNC_001779
1780	LNC_001778
1781	LNC_001781
1782	LNC_001782
1783	LNC_001783
1784	LNC_001784
1785	LNC_001785
1786	LNC_001786
1787	LNC_001787
1788	LNC_001788
1789	LNC_001789
1790	LNC_001790
1791	LNC_001791
1792	LNC_001792
1793	LNC_001793
1794	LNC_001794
1795	LNC_001795
1796	LNC_001796
1797	LNC_001797
1798	LNC_001798
1799	LNC_001799
1800	LNC_001800
1801	LNC_001801
1802	LNC_001802
1803	LNC_001803
1804	LNC_001804
1805	LNC_001805
1806	LNC_001806
1807	LNC_001807
1808	LNC_001808
1809	LNC_001809
1810	LNC_001810
1811	LNC_001811
1812	LNC_001812
1813	LNC_001813
1814	LNC_001814
1815	LNC_001815
1816	LNC_001816
1817	LNC_001817
1818	LNC_001818
1819	LNC_001819
1820	LNC_001820
1821	LNC_001821
1822	LNC_001822
1823	LNC_001823
1824	LNC_001824
1825	LNC_001825
1826	LNC_001826
1827	LNC_001827
1828	LNC_001828
1829	LNC_001829
1830	LNC_001830
1831	LNC_001831
1832	LNC_001832
1833	LNC_001833
1834	LNC_001834
1835	LNC_001835
1836	LNC_001836
1837	LNC_001837
1838	LNC_001838
1839	LNC_001839
1840	LNC_001840
1841	LNC_001841
1842	LNC_001842
1843	LNC_001843
1844	LNC_001844
1845	LNC_001845
1846	LNC_001846
1847	LNC_001847
1848	LNC_001848
1849	LNC_001849
1850	LNC_001850
1851	LNC_001851
1852	LNC_001852
1853	LNC_001853
1854	LNC_001854
1855	LNC_001855
1856	LNC_001856
1857	LNC_001857
1858	LNC_001858
1859	LNC_001859
1860	LNC_001860
1861	LNC_001861
1862	LNC_001862
1863	LNC_001863
1864	LNC_001864
1865	LNC_001865
1866	LNC_001866
1867	LNC_001867
1868	LNC_001868
1869	LNC_001869
1870	LNC_001870
1871	LNC_001871
1872	LNC_001872
1873	LNC_001873
1874	LNC_001874
1875	LNC_001875
1876	LNC_001876
1877	LNC_001877
1878	LNC_001878
1879	LNC_001879
1880	LNC_001880
1881	LNC_001881
1882	LNC_001882
1883	LNC_001883
1884	LNC_001884
1885	LNC_001885
1886	LNC_001886
1887	LNC_001887
1888	LNC_001888
1889	LNC_001889
1890	LNC_001890
1891	LNC_001891
1892	LNC_001892
1893	LNC_001893
1894	LNC_001894
1895	LNC_001895
1896	LNC_001897
1897	LNC_001896
1898	LNC_001898
1899	LNC_001899
1900	LNC_001900
1901	LNC_001901
1902	LNC_001902
1903	LNC_001903
1904	LNC_001904
1905	LNC_001905
1906	LNC_001906
1907	LNC_001907
1908	LNC_001908
1909	LNC_001909
1910	LNC_001910
1911	LNC_001911
1912	LNC_001912
1913	LNC_001913
1914	LNC_001914
1915	LNC_001915
1916	LNC_001916
1917	LNC_001917
1918	LNC_001918
1919	LNC_001919
1920	LNC_001920
1921	LNC_001921
1922	LNC_001922
1923	LNC_001923
1924	LNC_001924
1925	LNC_001925
1926	LNC_001926
1927	LNC_001927
1928	LNC_001928
1929	LNC_001929
1930	LNC_001930
1931	LNC_001931
1932	LNC_001932
1933	LNC_001933
1934	LNC_001934
1935	LNC_001935
1936	LNC_001936
1937	LNC_001937
1938	LNC_001938
1939	LNC_001939
1940	LNC_001941
1941	LNC_001942
1942	LNC_001940
1943	LNC_001943
1944	LNC_001944
1945	LNC_001945
1946	LNC_001946
1947	LNC_001947
1948	LNC_001948
1949	LNC_001949
1950	LNC_001950
1951	LNC_001952
1952	LNC_001951
1953	LNC_001953
1954	LNC_001954
1955	LNC_001955
1956	LNC_001956
1957	LNC_001957
1958	LNC_001958
1959	LNC_001959
1960	LNC_001960
1961	LNC_001961
1962	LNC_001962
1963	LNC_001963
1964	LNC_001964
1965	LNC_001965
1966	LNC_001966
1967	LNC_001967
1968	LNC_001968
1969	LNC_001969
1970	LNC_001970
1971	LNC_001971
1972	LNC_001972
1973	LNC_001973
1974	LNC_001974
1975	LNC_001975
1976	LNC_001976
1977	LNC_001977
1978	LNC_001978
1979	LNC_001979
1980	LNC_001981
1981	LNC_001980
1982	LNC_001982
1983	LNC_001983
1984	LNC_001984
1985	LNC_001985
1986	LNC_001986
1987	LNC_001987
1988	LNC_001988
1989	LNC_001989
1990	LNC_001990
1991	LNC_001991
1992	LNC_001992
1993	LNC_001994
1994	LNC_001993
1995	LNC_001995
1996	LNC_001996
1997	LNC_001997
1998	LNC_001998
[truncated: 20,138 more rows]
